1 **Spatial separation of *Streptomyces* aerial mycelium during fermentation enhances**  
2 **secondary metabolite production.**

3 Balaji Muralikrishnan<sup>1</sup>, Retnakumar R J<sup>1</sup>, Ranjit Ramachandran<sup>1</sup>, Vinodh J S<sup>2</sup>, Nijisha M<sup>1</sup>, Arun  
4 K B<sup>1</sup>, Laiza Paul<sup>1</sup>, Syed Dastager<sup>2</sup>, Vipin Mohan Dan<sup>3</sup>, Ajay Kumar Ramakrishnan<sup>1\*</sup>.

5 <sup>1</sup>Mycobacterium Research Laboratory, Rajiv Gandhi Centre for Biotechnology, Trivandrum,  
6 Kerala, India.

7 <sup>2</sup>NCIM – CSIR National Chemical Laboratory, Pune, Maharashtra, India

8 <sup>3</sup>Department of Microbiology, Jawaharlal Nehru Tropical Botanical Garden & Research  
9 Institute, Palode, Kerala, India

10 <sup>4</sup>Department of Biotechnology, University of Kerala, Trivandrum, Kerala, India.

11 **\* Correspondence:**

12 Ajay Kumar Ramakrishnan

13 [rakumar@rgcb.res.in](mailto:rakumar@rgcb.res.in)

14 **Keywords:** Streptomyces, secondary metabolite production, antibiotics, aerial mycelium,  
15 response surface methodology.

16 **Abstract:**

17 Conditioning of morphology is an effective technique to enhance secondary metabolite  
18 production by *Streptomyces*. Here we report a novel conditioning method employing glass  
19 marbles in batch cultures to enhance secondary metabolite production by *Streptomyces sp.* The  
20 marbles seem to spatially separate aerial and submerged mycelia in the flask which was  
21 necessary for the qualitative and quantitative enhancement of metabolite production of secondary  
22 metabolites. The method also offers shorter incubation period compared to conventional methods  
23 for effective production. Further, using a combination of this method and response surface  
24 methodology we could enhance the production of antimycobacterial molecules chrysomycin A  
25 and B significantly.

26 **Importance:**

27 Rediscovery of existing molecules and lack of techniques to induce production of secondary  
28 metabolites are the major bottlenecks associated with drug discovery of novel bioactive  
29 molecules from *Streptomyces*, the major source of marketable drugs today. We found a new  
30 method to increase the diversity and quantity of secondary metabolites in two *Streptomyces*  
31 species. This method thus enhances the chance of finding novel active principles from  
32 *Streptomyces*.

33 **1. Introduction:**

34 From enzymes to antibiotics, most of the usable bio-active molecules have been discovered from  
35 Actinomycetes. However, there prevails a lameness in finding novel molecules from these  
36 organisms which led to the recent disinterest in this platform. This bottleneck is fuelled by the  
37 rediscovery of known molecules and lack of techniques in inducing the bacteria to produce novel

38 products. Among them, *Streptomyces* are still an attractive source for the discovery of novel bio-  
39 actives. Their diverse biosynthetic gene clusters are responsible for the production of novel  
40 chemical entities (1). However, there seems to be a difficulty in inducing the expression of  
41 cryptic gene clusters coding for enzymes responsible for the production of diverse secondary  
42 metabolites under laboratory conditions. This failure in inducing these gene clusters has led to  
43 missing out potential secondary metabolite producers.

44 Conditioning morphology is a technique used to enhance secondary metabolite production  
45 (SMP) in *Streptomyces* by manipulating its growth conditions. For example, *Streptomyces*  
46 mycelia generally form aggregates in liquid media and inhibition of this clumping and achieving  
47 homogenous growth lead to the synthesis of novel compounds. This was conventionally  
48 performed by placing solenoids in the shake flask to disintegrate mycelial aggregates(2, 3).  
49 Similar results were achieved by manipulating genes such as *csIA*, *glxA* and *ntpA* to prevent  
50 aggregation without physical intervention. On the other hand, there are also contrary findings  
51 that show aggregation favors production of novel compounds (4-7). However, inside a  
52 bioreactor, pellet formation results in slower growth, and culture heterogeneity contributes to  
53 suppression of SMP. Sporulation in liquid media is another process that accompanies  
54 mycelial aggregation which also retards SMP. Thus, a conditioning method which disintegrates  
55 clumps, avoids sporulation and induces robust SMP is the need of the hour to rejuvenate the  
56 *Streptomyces* platform for finding novel bio-actives.

57 In this study, we present a method for fermentation by *Streptomyces* which enhances and  
58 diversifies the SMP that eventually turns non-producers into producers of antibiotics. The  
59 method involves interference in cellular events of the life cycle of *Streptomyces* and which  
60 induces the SMP. We provide evidence for spatial separation of aerial mycelia from vegetative  
61 mycelia using glass marbles in the production flask. In addition, we observed inhibition of SMP  
62 by aerial mycelia, and that it is essential to remove them continuously from the fermentation  
63 medium to increase SMP. Earlier in our drug discovery program to discover antimycobacterial  
64 and anti-cancer molecules, we used this method and we could isolate two novel compounds  
65 (chrysofycin A & B - antimycobacterial molecules, and urdamycin – an anti-cancer agent).  
66 Using the method described here and response surface methodology we could scale up the  
67 production of chrysofycins by several fold compared to conventional methods of fermentation.  
68 Thus, the presence of marbles significantly increases the production of secondary metabolites.

## 69 **2. Materials and Methods**

### 70 **2.1. Bacterial cultures and general materials:**

71 *Streptomyces sp.*OA161 and *Streptomyces sp.*, OA293 were from our own Actinomycetes  
72 repository (GenBank IDs KX364040 and KY014435, respectively). Polycarbonate autoclavable  
73 250 mL Erlenmeyer flasks were procured from Tarsons(India) and used for culturing. Glass  
74 marbles, purchased locally, were 1 cm in diameter and weighed approximately 5 grams each.  
75 Nile red and SYTO 9 stains were procured from Sigma and Thermo Scientific, respectively.  
76 HPLC grade D-(+)-trehalose dehydrate, was procured from Fluka™ Fischer Scientific.

### 77 **2.2. Fermentation:**

#### 78 **2.2.1. Seed culture:**

79 The spores of *Streptomyces* isolates grown on solid ISP-2 (International Streptomyces Project  
80 medium) were used to prepare the seed culture. Seed cultures were grown in 50 ml of ISP-2

81 broth in 250mL flasks. Two sterile glass marbles were introduced into the flasks. The seed  
82 culture was incubated at 30 °C on a shaker incubator at 250 rpm for 72 h. The seed culture was  
83 used to inoculate 50 mL of fresh medium in test flasks at 1% (vol/vol) concentration.

### 84 **2.3. Assessment of secondary metabolite profile:**

85 Fifty millilitre of ISP-2 medium was used as the fermentation medium for both the strains. Each  
86 250 mL flask received 1% inoculum (vol/vol). Flask 1 contained none of the mechanical  
87 disruptors; flask 2 contained a solenoid immersed in the medium; and flask 3 and 4 contained  
88 two glass marbles in each. Generally, culturing with marbles resulted in the formation of a thick  
89 deposit on the inside of the flask due to the swirling motion of the medium during incubation.  
90 The deposit was pushed back into the medium in flask 4 using a sterile loop whenever it was  
91 formed. Flasks 5 and 6 were replicates of flask 1 until day 6. Later, flask 6 received the thick  
92 deposit from the wall of flask 3, and flask 5 served as control for this experiment. Both the flasks  
93 were incubated for 3 more days. After fermentation, 10 mL of media was drawn from each flask  
94 and the cell-free supernatant was extracted with equal volume of ethyl acetate by two-phase  
95 extraction. The ethyl acetate extract was collected and dried using a vacuum concentrator at  
96 37°C. The concentrated extract was resuspended in 100µL of ethylacetate from which 10µL was  
97 spotted on to silica plates for performing TLC.

#### 98 **2.3.1. Thin Layer Chromatography:**

99 Two-dimensional thin layer chromatography was performed to visualize and compare the SMP  
100 profile from the test and control flasks. Silica gel 60 F254 (Millipore India) was used as the  
101 stationary phase. In the first dimension, either hexane:acetone (1:1) or chloroform: acetone (7:3)  
102 was used for separating the compounds in the extracts from the culture filtrate of *Streptomyces*  
103 *sp.*, OA161 or *Streptomyces sp.*, OA293, respectively(8, 9). After drying at room temperature,  
104 the plates were turned 90 degrees, and ethyl acetate was used to resolve molecules in the second  
105 dimension. After drying, photographs were taken using Light L16 camera under UV light (254  
106 nm). Densitometry analysis of the spots was performed with Image J software. The results were  
107 plotted and tested for significance using GraphPad Prism version 7.

#### 108 **2.3.2. LC- MS analysis:**

##### 109 **2.3.2.1. Analysis of metabolites in ethylacetate extracts:**

110 The concentrated extracts prepared for TLC were resuspended in 400µL of acetonitrile instead of  
111 ethyl acetate. Each sample (7.5 µL) was injected into the C18 reverse phase (high-strength silica,  
112 2.1 × 100 mm, 1.8 µm) Waters column maintained at 40 °C. The mobile phase had two  
113 components - 0.1% formic acid in ultrapure water (A) and 0.1% formic acid in acetonitrile (B).  
114 The run program followed was 0 min, 1% B; 2 min, 10% B; 6 min, 30% B; 8 min, 50% B;  
115 12 min, 75% B; 15 min, 99% B; and 20 min, 1% B. Further analysis was performed using Waters  
116 ACQUITY UPLC system (Waters, Milford, MA, USA) coupled to a quadrupole–time-of-flight  
117 (Q–TOF) mass spectrometer (SYNAPT-G2, Waters). The total run was for 20 min and the  
118 systems were operated and controlled by MassLynx4.1 SCN781 software (Waters).

##### 119 **2.3.2.2. Mass spectrometry**

120 The SYNAPT® G2 High Definition MS™ System mass spectrometer (Waters) was used in  
121 positive and negative resolution mode with electrospray ionization (ES+) source over a mass  
122 range of 50–1500 Da. The capillary voltage and sampling cone voltage were set at 3.0 kV and

123 30 kV, respectively. Cone and desolvation gas flow rates were adjusted to 80 L/h and 600 L/h,  
124 respectively. Ion source and desolvation gas (nitrogen) temperatures were kept constant at  
125 130 °C and 450 °C, respectively. Lock mass acquisition was performed every 30 s by leucine–  
126 enkephalin (556.2771 [M+H]<sup>+</sup>) for accurate on-line mass calibration. All the spectra were  
127 acquired for 0.25 s with an inter-scan delay of 0.024 s. The total metabolite profiles were  
128 compared for differential production of compounds. In addition, random molecular weights were  
129 compared to see if there is a differential production in specific molecules.

#### 130 **2.4. Quantification of trehalose content:**

131 The thick deposits on the inside wall of the flasks and the broth culture (wet weight of 150 mg of  
132 each) were washed with 1X PBS (phosphate buffered saline). After washing, sterile water (1 mL)  
133 was added to the bacterial pellet and boiled for 30 min in a boiling water bath. The suspension  
134 was passed through 0.2 micron filter and the contents were separated using HILIC column.  
135 Acetonitrile:ammonium acetate gradient was used as the mobile phase and the total duration of  
136 the run was 22 minutes. MS was employed to identify trehalose, HPLC-grade trehalose, Sigma  
137 served as the standard.

#### 138 **2.5. Nile Red Staining and Confocal Microscopy:**

139 Nile red staining was performed as described elsewhere(10)on the broth culture and the bacteria  
140 from the circular depositof both the flasks (with and without glass marbles). Briefly, bacterial  
141 smear on a glass slide was flooded with Nile red dissolved in methanol (40 µg/mL). After 20  
142 minutes, it was washed with running water and counterstained with SYTO 9. The slides were  
143 visualized under a Nikon-A1 R confocal microscope.

#### 144 **2.6. Scanning electron microscopy:**

145 *Streptomyces* culture from the circular deposit from flask 3 was loaded on to gelatin coated  
146 cover-slips and then fixed overnight with 6.25% glutaraldehyde (in 50 mM phosphate buffer, pH  
147 7.4). The cover slips were then dehydrated using increasing gradients of ethanol (30-100%) and  
148 left for drying. The dried cover slips were then fixed on stubs and sputter-coated with gold  
149 followed by imaging using Scanning electron microscope (FEI ESEM Quanta 200-3D, USA).

#### 150 **2.7. Analysis of cell death :**

151 Cultures incubated for 4-6 days were subjected to cell death analysis. LIVE/DEAD®BacLight™  
152 bacterial viability kit procured from Invitrogen (L7007 Molecular Probes, Invitrogen) was used  
153 to assess cell death in the strains grown by different methods. Procedures were performed as per  
154 the instructions of the manufacturer. Briefly, the bacterial cells were incubated with reagent  
155 mixture of the kit at 37°C for 15 min in the dark and the fluorescence intensity was measured  
156 immediately using TECAN Infinite M200 (data acquired by Magellen v6.6 software) at 530 nm  
157 (green) and 630 nm (red), after excitation at 485nm. The ratio of red to green intensity was  
158 calculated and compared for the cultures grown with and without marbles.

#### 159 **2.8. Media optimization:**

##### 160 **2.8.1. Bacterial culture conditions and estimation of chrysomycin.**

161 Initially, *Streptomyces sp.*,OA161 - seed culture was prepared by inoculating a loop-full of  
162 spores into ISP-2 medium.After incubation for 72 h, 1% (v/v) inoculum was used to grow the  
163 bacteria on media containing different carbon sources (ISP-1, ISP-2, mISP-2, ISP-4, and ISP-7).

164 The cultures were incubated at 28°C for 6 days at 250 rpm on a shaker incubator. After  
165 fermentation, the bacteria-free medium was extracted with equal volume of ethyl acetate and  
166 concentrated. The antimycobacterial fraction (AMF) was separated as described in section 2.3.1  
167 (9). Intrinsic fluorescence of chrysomycin A & B, was used for the assessment of their  
168 production. Upon shining UV light (365 nm), the green fluorescence emitted by chrysomycins  
169 was photographed and densitometry analysis was performed with Image J software. The results  
170 were plotted and tested for significance using GraphPad Prism version 7.

### 171 **2.8.2. Screening for essential media components for production of chrysomycin A & B by** 172 **Plackett-Burman Design (PBD).**

173 PBD was employed for identifying the significant factors that influence chrysomycin production.  
174 To increase the robustness of the design, a three level factorial design with high (+1),  
175 intermediate (0) and low (-1) levels with 4 centre points was used in the screen compared to the  
176 conventional two factorial design. The matrix design is shown in Table 1, and the media  
177 components along with their concentrations are provided in Table 2. The influencing factors  
178 were screened by performing an F-test. A Pareto chart was also generated with the t-value of the  
179 effect to represent how each factor affects the production of chrysomycin. The positive  
180 influencing factors were used in the interaction study with Box-Behnken designs. Negatively  
181 influencing factors and factors that induced dummy variable traps were not considered  
182 for subsequent studies. Components of modified ISP-2 medium, sodium chloride and calcium  
183 carbonate along with dummy factors (magnesium sulphate, ferrous sulphate, asparagine, sodium  
184 hydrogen phosphate, Tween 80 and temperature) were selected for the screening process. All the  
185 experiments were conducted in triplicates.

### 186 **2.8.3. Optimization of medium components by Response Surface Methodology.**

187 Box-Behnken design was used to study the interaction between the screened factors with respect  
188 to chrysomycin production. A three-level factorial design with 2 centre points was used in the  
189 interaction study. The data were analyzed by fitting the regression values into a second order  
190 polynomial equation,

$$191 Y = \beta_0 + \beta_1 X_1 + \beta_2 X_2 + \beta_3 X_3 + \beta_4 X_4 + \beta_{12} X_1 X_2 + \beta_{13} X_1 X_3 + \beta_{14} X_1 X_4 + \beta_{23} X_2 X_3 + \beta_{24} X_2 X_4 + \beta_{34} X_3 X_4 + \beta_{11} X_{12} + \beta_{22} X_{22} + \beta_{33} X_{32} + \beta_{44} X_{42}.$$

193 Y represents the response values,  $\beta$  denotes the regression coefficient, and  $X_1, X_2, X_3, X_4$   
194 represent the significant factors selected in this study. The character of the polynomial fit is  
195 expressed as coefficient  $R^2$ , and the significance was calculated by F-test. All the experiments  
196 were conducted in triplicates. The design matrix containing the screened components and their  
197 respective concentrations are given in the electronic version of the supplementary data.

### 198 **2.8.4. Statistical Analysis:**

199 Design-Expert software 12.0 (*Stat-Ease, Minneapolis*) was employed for the experimental design  
200 and data analysis. Models were used to predict best yield of chrysomycin and the derived  
201 combinations of medium components were used to validate the effect of our observations on the  
202 production of chrysomycin A & B. The predicted values were compared with the observed  
203 values, and significance of the data was obtained to validate the models.

## 204 **3. Results and Discussion:**

### 205 **3.1. Marbles assist in robust SMP in *Streptomyces* sp.**

206 Figure 1A shows schematic representation of flasks with and without mechanical disruptors.  
207 Figures 1B and 1C represent 2D TLC profiles of secondary metabolites of bacteria-free  
208 supernatants of two different isolates (*Streptomyces* sp., OA161 and *Streptomyces* sp., OA293).  
209 Medium in flask 3 (with marbles) had more secondary metabolites than flask 1 and 2, and was  
210 supported by LC-MS analysis. In addition, comparison of profiles showed that production of the  
211 metabolites was enhanced and production of a few metabolites remained unaffected  
212 (Supplementary Figure 1). We speculate that the latter are basal metabolites involved in bacterial  
213 survival. The strains used in the experiments were known to produce unique antibiotics,  
214 chrysomycins (9) and urdamycins, respectively (11). Therefore, we compared their production  
215 by 2D TLC (white arrows point at the compounds, Figures 1D and 1E) to support the enhanced  
216 SMP. As expected these compounds were produced in very small quantities or absent in  
217 conventionally grown cultures as against their significantly high levels when marbles were  
218 introduced into the cultures.

### 219 **3.2. Marbles increase the growth rate of *Streptomyces* and assist in spatial separation of** 220 **bacterial mycelia.**

221 To analyze whether marbles provide an advantage in biomass production, the growth pattern of  
222 both the isolates grown in flasks 1, 2 and 3 were tracked and compared (Figure 1E). Interestingly,  
223 the strains had insignificant difference in biomass, but differed in their growth rates. Generally a  
224 biphasic growth is commonly observed in most *Streptomyces* cultures (4). However, in the  
225 presence of marbles, cultures exhibited a standard sigmoid growth curve. This was intriguing and  
226 warranted the examining of the morphology of the culture under different growth conditions.  
227 Interestingly, all the flasks had bacterial deposit on their inside as shown in the representative  
228 figure (Figure 1A), but flask 3 had the thickest ring and had a spore-like chalky appearance.

### 229 **3.3. The bacterial deposits suppress SMP on contact with the broth culture.**

230 To find whether the bacterial deposit on the wall (flask 3) affect SMP, the ring was pushed back  
231 into the broth culture whenever visible aggregates were formed (until 6 days). Interestingly, this  
232 significantly reduced the SMP (flask 4 in Figures 1B and 1C). To confirm that this reduction was  
233 indeed because of the bacterial deposit, these were transferred to a flask without any mechanical  
234 disruptors (Flask 6) which was previously incubated for 6 days. As expected, a similar reduction  
235 pattern was observed in flask 6 compared to flask 5. This data was in line with the data shown in  
236 flask 3 and 4 (Figure 1E). The metabolomic patterns observed in 2D TLC plate were validated  
237 using LC-MS analysis (Figure 1F and 1G) and the number of metabolites were compared and  
238 presented in supplementary figure 2.

### 239 **3.4. The deposit on the inside wall of the flask was identified as the aerial mycelium of** 240 ***Streptomyces*.**

241 In the life cycle of *Streptomyces*, a spore germinates to form vegetative mycelium during  
242 favorable conditions and later differentiates into aerial mycelium. Progression of spore formation  
243 in aerial mycelia is accompanied by formation of a hydrophobic sheath around them during  
244 which SMP diminishes. Hence, we hypothesized that the marbles could be interfering with this  
245 step to enhance SMP. They could be aiding in selectively removing the aerial mycelium from the  
246 vegetative mycelia. To test this possibility, we stained the aerial and vegetative mycelia with  
247 Nile Red (which is used to stain hydrophobic and neutral lipids) to distinguish between

248 hydrophilic and hydrophobic mycelia. In Figure 2A, the first two rows represent *Streptomyces*  
249 sp.,OA161 from broth culture, and the rest represent bacteria from the wall deposits. The green  
250 color shows the presence of the hydrophilic bacteria (as SYTO9 stains the DNA) and red  
251 represents the hydrophobic bacteria stained by Nile red. The broth culture from flask 1 had  
252 intense red stain throughout while culture of flask 3 had picked up the red stain in isolated  
253 regions. On comparing the bacteria from wall deposits, red stain was absent on the thin wall  
254 deposits of flask 1 while the thicker counterpart of flask 3 stained intense red. Similar results  
255 were obtained when the same experiment was repeated on *Streptomyces* sp.,OA293  
256 (Supplementary Figure 3). These results suggest that the marbles caused mechanical shearing  
257 that separated the aerial mycelium. The hydrophobic aerial mycelia were deposited on the sides  
258 of the flask due to the swirling movement of the medium. On the other hand, in flasks without  
259 marbles, vegetative mycelium was found forming insignificant amounts of deposits which did  
260 not affect the SMP. Further to confirm whether the intense red region is in fact the broken aerial  
261 mycelium, scanning electron microscopy was performed which revealed aerial mycelium with  
262 spores (Figure 2B). Manipulation of genes such as *csl A* and *glx A* to prevent differentiation of  
263 aerial mycelium was attempted recently (12) to increase SMP. Marbles seem to provide a simple  
264 and inexpensive alternative to such genetic manipulations and provide better yield of secondary  
265 metabolites.

### 266 **3.5. Measurement of cell death and intracellular trehalose.**

267 In the life cycle of *Streptomyces*, after the initiation of aerial mycelium formation, the vegetative  
268 mycelium undergoes cell death. Therefore, cell death was assessed in broth cultures of flasks 1  
269 and 3 during 96 h to 144h (stationary phase). The ratios of dead to live bacteria were lower in the  
270 presence of marble (flask 3) supporting better SMP. On the other hand, the ratios were  
271 significantly higher in flask 1 correlating with the formation of aerial mycelium (Figure 2C).  
272 Trehalose content in the mycelium is known to reflect the state of development of *Streptomyces*.  
273 Increased trehalose content is reported in differentiated aerial mycelium compared to glycogen-  
274 rich vegetative mycelium (13, 14). Therefore, we compared the trehalose content of the broth  
275 culture and wall deposits of flask 1 and 3. As expected, the trehalose content of the wall deposit  
276 was higher than that in the broth cultures of flask 3 (Figure 2D, and Supplementary Figure 3A).  
277 However, we could not establish the same in the other strain, *Streptomyces* sp., OA293, as  
278 different *Streptomyces* species are known to use different storage molecules. For example, *S.*  
279 *lividans* was found to accumulate triacylglycerols instead of trehalose (15). Thus, the results of  
280 cell death and trehalose accumulation support the hypothesis that the marbles selectively remove  
281 the differentiating aerial mycelia and thereby extend the period of SMP. Although this study  
282 found a robust method for SMP, we could not establish a link between the enhanced SMP and  
283 activation of cryptic biosynthetic gene clusters in these organisms. We assume that the stress  
284 caused by breakage of mycelia might have triggered the induction of cryptic genes leading to  
285 enhanced SMP. Further, the results call for the designing of non-canonical bioreactors which can  
286 selectively remove the aerial mycelium from the broth culture to increase the yield. Based on our  
287 observations, we propose that by incorporating novel designs in fermentors to remove aerial  
288 mycelia from *Streptomyces*, it is possible to enhance the yield of secondary metabolites while  
289 scaling up.

### 290 **3.6. Optimization of chrysomycin production medium through response surface** 291 **methodology.**

#### 292 **3.6.1. Selection of media and conditions for antibiotic production:**

293 The production of chrysomycins was better in ISP- 2 medium compared to that in other media  
294 (ISP-1, ISP-4 and ISP-7) tested. However, when malt extract was replaced with maltose in ISP-2  
295 medium (named as modified ISP-2 medium (mISP-2)), the production of chrysomycins was  
296 found to increase significantly (Figure 3A). This encouraged us to use the components of the  
297 modified medium in response surface methodology (RSM) studies. One-factor-at-a-time  
298 approach ensured that variation in temperature had least effect on production (Figure 3B), and  
299 thus it was included as a dummy factor/variable. Altogether, the main components of the mISP-2  
300 medium (maltose, yeast extract and dextrose) and dummy factors such as Tween80, sodium  
301 hydrogen phosphate, temperature, magnesium sulphate, ferrous sulphate and asparagine were  
302 included in the study. As the *Streptomyces* OA161 strain was mildly halophilic (Supplementary  
303 Figure 4C) we included sodium chloride to the list of test variables. Calcium carbonate was also  
304 included in the study as it is known to enhance SMP in actinomycetes (16).

### 305 3.6.2. Screening of factors that influence production of chrysomycins.

306 Plackett-Burman design (PBD) was used for the screening process. A total of 16 experiments  
307 were performed as suggested by the PBD for screening 11 variables. Their individual responses  
308 (chrysomycins production in arbitrary units) are given in the Supplementary Table 1. The  
309 amount of chrysomycins was determined from the TLC plate (Supplementary Figure 4B). The  
310 relationship between the variable factors and responses were analyzed by analysis of variance  
311 (ANOVA). The statistical significance of the model and the variables are given in Table 2.  
312 Factors other than temperature and sodium chloride affected the production significantly.  
313 Generally, the alterations caused by the dummy factor in production and their positive statistical  
314 significance are results of ‘dummy variable traps’ and hence those factors were not considered in  
315 subsequent studies. A Pareto chart (Figure 3C) was generated based on the t-values calculated  
316 and it showed that yeast extract and calcium carbonate enhanced production while the carbon  
317 sources dextrose and maltose exerted a negative influence on the production of chrysomycins.  
318 The predicted responses were in agreement with the observed responses as evidenced by a  
319 straight line in Figure 3D. This strongly suggests the need of an interaction study to formulate an  
320 efficient production media as dextrose and maltose are the major carbon sources. Regression  
321 values were calculated and fit into a linear equation as follows,

$$322 \quad Y = 2.291E+06 - 4.698E+05 A + 1.226E+06 B - 3.685E+05 C + 7.078E+05 D - 1.668E+05 F - \\ 323 \quad 4.387E+05 G + 7.121E+05 H - 5.182E+05 J + 3.956E+05 K + 7.574E+05 L.$$

324 Furthermore,  $R^2$  value of 0.986 states that the model equation could justify 98.6% of the total  
325 variation.

### 326 3.6.3. Optimization of medium components with Box-Behnken Designs (BBD):

327 As maltose, dextrose, calcium carbonate and yeast extract were identified as the most influential  
328 factors, they were used for optimizing the production medium (data provided in the  
329 Supplementary Table 2) using BBD. Twenty runs were performed at 30°C and 250 rpm. The  
330 effect of individual variables on production was assessed using ANOVA (Table 3). Briefly, the  
331 model was statistically significant and  $R^2$  value of 0.93 indicates that the model equation could  
332 justify 93% of the total variation. Also, the regression value for each variable was fitted into a  
333 second-order quadratic equation as a function of response values.

$$334 \quad Y = 4045178.8266667 - 181925.17333333 A + 2945433.4533333 B + 454559.66133333 C - \\ 335 \quad 1124191.8746667 D - 416584.84 AB + 2808306.28 AC - 229510.4 AD + 522381.3 BC -$$



336 1446286.5 **BD** - 128049.884 **CD** + 1437522.0926667 **A**<sup>2</sup> - 1375725.0473333 **B**<sup>2</sup> +  
337 648742.84466667 **C**<sup>2</sup> - 273025.99533333 **D**<sup>2</sup>

338 Y is the response (chrysomycin A & B production) and A, B, C, D are factors denoting maltose,  
339 yeast extract, dextrose and calcium carbonate. The predicted responses were in agreement with  
340 the observed responses, indicated by a straight line. The response surface plots were generated as  
341 three-dimensional contour plots illustrating the interaction between two factors individually  
342 keeping the other factors at their mid-level. The diagnostic plots that are indicators for the  
343 validated model is shown in Supplementary Figure 4D. Analyzing the 3D plots, there seemed to  
344 be no interaction between calcium carbonate and dextrose; calcium carbonate and yeast extract;  
345 and between maltose and yeast extract, respectively (Figure 3E). However, a positive interaction  
346 was observed between maltose and dextrose at the low and high concentrations but not at the mid  
347 level concentration. This is in line with our earlier observation that when malt extract is replaced  
348 by maltose, it leads to higher production of chrysomycins. Similar interaction was also observed  
349 between dextrose and yeast extract. Also, a negative interaction was observed with calcium  
350 carbonate and maltose. Considering the results, a list of solutions were sought from the Design  
351 Expert software which suggested 15 mg/mL of maltose, 4 mg/mL of yeast extract and 10 mg/mL  
352 of dextrose with no calcium carbonate in the production media can lead to a yield of  
353 1.35429E+07a.u. of chrysomycins. The same was observed in fermentation (Figure 3F) when the  
354 predicted and observed responses were compared. Also, no significant difference was observed  
355 between them. Thus, the model was validated and a three-fold increase in production was  
356 achieved. This is the first report that attempted to optimize production of chrysomycins through  
357 statistical methods. We could successfully enhance the production to almost 24 fold when  
358 compared to traditional fermentation techniques.

#### 359 4. **Conclusion:**

360 Introduction of glass marbles in culture flasks results in robust secondary metabolite production  
361 in *Streptomyces*. The marbles spatially separate the differentiated aerial mycelia from vegetative  
362 mycelia by mechanical shearing and the swirling movement of the medium physically lifts the  
363 aerial mycelium along the walls of the flask. This method could be used for effective SMP in  
364 *Streptomyces*. We speculate that this separation of aerial mycelium can lead to the activation of  
365 biosynthetic gene clusters responsible for SMP. Response surface methodology helped in  
366 optimizing the media components for increased yield of chrysomycins. We achieved an overall  
367 24 fold increase in production when compared to the conventional methods of fermentation.

#### 368 **Author contributions:**

369 RAK and BM conceptualized and wrote the manuscript. BM, RRJ, RR, NM and LP performed  
370 the experiments. VJS and SD performed SEM analysis. KBA and VMD made the tables and  
371 figures.

#### 372 **Funding:**

#### 373 **Acknowledgement:**

374 BM thanks CSIR, Govt. of India for research fellowship and RAK thanks Department of  
375 Biotechnology, Govt. of India for funding. The authors thank Dr. Rajeev K. Sukumaran,  
376 Microbial processes and technology division, National institute for interdisciplinary Science and  
377 Technology (NIIST), Trivandrum for his critical evaluation of the manuscript.

378 **Supplementary data is attached as a separate word file.**

379 **Conflict of interests:** The authors declare no conflict of interests.

380 **Legends:**

381 **Figure 1:** Marbles assist in robust SMP by separating the production-retarding mycelia from the  
382 metabolically active mycelia. Schematic representation of the test shake flask cultures is given  
383 in A. B and C represent secondary metabolite profiles (2D TLC) from *Streptomyces* sp.OA161  
384 and *Streptomyces* sp.,OA293, grown in flasks as represented above. White arrow denotes  
385 urdamycins in B, and chrysomycins in C. D and E represent the densitometric measurement of B  
386 and C, respectively. F shows the growth curves of both the *Streptomyces* species grown with and  
387 without marbles. G and H show the HPLC and mass spectrometry profiles of the ethyl acetate  
388 extracts of flasks 1 to 6.

389 **Figure 2:** The wall deposits are aggregates of aerial mycelium. (A) Confocal microscopy images  
390 show bacteria from broth and wall deposits. '+●' and '-●' represent bacteria from flasks with  
391 and without marbles, respectively. The differentiated aerial mycelium appears red and all live  
392 bacteria are green. (B) Scanning electron micrographs of the deposit on the inner wall of the  
393 flask. The expanded image on the right shows the morphology of the sporophores on the aerial  
394 mycelia. (C) Graphical representation of cell death analysis. (D) Comparison of trehalose content  
395 of wall deposits and the broth culture, by LC-MS analysis.

396 **Figure 3:** Optimization of chrysomycin production media. (A) Selection of basal medium for the  
397 production of chrysomycin. (B) Effect of temperature on production of chrysomycin. (C) Pareto  
398 chart showing the effect of individual variables on chrysomycin production. (D) Diagnostic plot  
399 of the Plackett-Burman design model shows that predicted and observed responses fall on a  
400 straight line. (E) Three-Dimensional plots showing interaction between medium components on  
401 chrysomycin production. 1. yeast extract vs maltose; 2. dextrose vs maltose; 3. calcium  
402 carbonate vs maltose; 4. dextrose vs yeast extract; 5. calcium carbonate vs yeast extract; 6.  
403 calcium carbonate vs dextrose. (F) The predicted and observed levels of chrysomycin production  
404 after optimization.

405  
406 **Table 1** Plackett-Burman matrix of the experimental design. A to K represent test factors and Y  
407 denotes the response. A: maltose; B: yeast extract; C: dextrose; D: calcium carbonate;  
408 E: temperature; F: sodium chloride; G: magnesium sulphate; H: ferrous sulphate; J: Tween 80; K:  
409 asparagine; L: sodium dihydrogen phosphate; Y: chrysomycins production.

410 **Table 2** Results of ANOVA for Plackett-Burman designs.

411 **Table 3** Results of ANOVA for Box-Behnken designs.

412

413

414

415

## 416 **References:**

- 417 1. G. P. van Wezel and K. J. J. N. p. r. McDowall: The regulation of the secondary metabolism of  
418 *Streptomyces*: new links and experimental advances, 28(7), 1311-1333 (2011)
- 419 2. S. Tamura, Y. Park, M. Toriyama, M. J. J. o. f. Okabe and bioengineering: Change of mycelial  
420 morphology in tylosin production by batch culture of *Streptomyces fradiae* under various shear  
421 conditions, 83(6), 523-528 (1997)
- 422 3. T. Kieser, M. J. Bibb, M. J. Buttner, K. F. Chater and D. A. Hopwood: Practical streptomyces  
423 genetics. John Innes Foundation Norwich, (2000)
- 424 4. A. Manteca, R. Alvarez, N. Salazar, P. Yagüe and J. J. A. E. M. Sanchez: Mycelium differentiation  
425 and antibiotic production in submerged cultures of *Streptomyces coelicolor*, 74(12), 3877-3886 (2008)
- 426 5. M. Sarra, C. Casas, F. J. B. Godia and bioengineering: Continuous production of a hybrid  
427 antibiotic by *Streptomyces lividans* TK21 pellets in a three-phase fluidized-bed bioreactor, 53(6), 601-  
428 610 (1997)
- 429 6. S. Vecht-Lifshitz, Y. Sasson and S. J. J. o. a. b. Braun: Nikkomycin production in pellets of  
430 *Streptomyces tendae*, 72(3), 195-200 (1992)
- 431 7. R. Giudici, C. R. Pamboukian, M. C. R. J. B. Facciotti and bioengineering: Morphologically  
432 structured model for antitumoral retamycin production during batch and fed-batch cultivations of  
433 *Streptomyces olindensis*, 86(4), 414-424 (2004)
- 434 8. V. M. Dan, B. Muralikrishnan, R. Sanawar, J. Vinodh, B. B. Burkul, K. P. Srinivas, A. Lekshmi, N.  
435 Pradeep, S. G. Dastager and B. J. S. r. Santhakumari: *Streptomyces* sp metabolite (s) promotes Bax  
436 mediated intrinsic apoptosis and autophagy involving inhibition of mTOR pathway in cervical cancer cell  
437 lines, 8(1), 2810 (2018)
- 438 9. B. Muralikrishnan, V. M. Dan, J. Vinodh, V. Jamsheena, R. Ramachandran, S. Thomas, S. G.  
439 Dastager, K. S. Kumar, R. S. Lankalapalli and R. A. J. R. A. Kumar: Anti-microbial activity of chrysomycin A  
440 produced by *Streptomyces* sp. against *Mycobacterium tuberculosis*, 7(58), 36335-36339 (2017)
- 441 10. M. J. Bush, M. J. Bibb, G. Chandra, K. C. Findlay and M. J. J. M. Buttner: Genes required for aerial  
442 growth, cell division, and chromosome segregation are targets of WhiA before sporulation in  
443 *Streptomyces venezuelae*, 4(5), e00684-13 (2013)
- 444 11. V. M. Dan, V. JS, S. CJ, R. Sanawar, A. Lekshmi, R. A. Kumar, T. S. Kumar, U. K. Marelli, S. G.  
445 Dastager and M. R. Pillai: Molecular networking and Whole-genome analysis aid discovery of an  
446 angucycline that inactivates mTORC1/C2 and induces programmed cell death. *ACS Chemical Biology*  
447 (2020)
- 448 12. E. E. Arroyo-Pérez, G. González-Cerón, G. Soberón-Chávez, D. Georgellis and L. J. F. i. m. Servín-  
449 González: A Novel Two-Component System, Encoded by the sco5282/sco5283 Genes, Affects  
450 *Streptomyces coelicolor* Morphology in Liquid Culture, 10, 1568 (2019)
- 451 13. D. Schneider, C. Bruton, K. J. M. Chater and G. G. MGG: Duplicated gene clusters suggest an  
452 interplay of glycogen and trehalose metabolism during sequential stages of aerial mycelium  
453 development in *Streptomyces coelicolor* A3 (2), 263(3), 543-553 (2000)
- 454 14. B. Rueda, E. M. Miguélez, C. Hardisson and M. B. J. F. m. I. Manzanal: Changes in glycogen and  
455 trehalose content of *Streptomyces brasiliensis* hyphae during growth in liquid cultures under sporulating  
456 and non-sporulating conditions, 194(2), 181-185 (2001)
- 457 15. A. Deniset-Besseau, C. B. Prater, M.-J. I. Virolle and A. J. T. j. o. p. c. I. Dazzi: Monitoring  
458 triacylglycerols accumulation by atomic force microscopy based infrared spectroscopy in streptomyces  
459 species for biodiesel applications, 5(4), 654-658 (2014)
- 460 16. S.-S. Yang, C.-M. J. W. J. o. M. Lee and Biotechnology: Effect of culture media on protease and  
461 oxytetracycline production with mycelium and protoplasts of *Streptomyces rimosus*, 17(4), 403-410  
462 (2001)

463 **Table 1**

464

| <b>Run</b> | <b>A</b> | <b>B</b> | <b>C</b> | <b>D</b> | <b>E</b> | <b>F</b> | <b>G</b> | <b>H</b> | <b>I</b> | <b>J</b> | <b>K</b> | <b>Y</b> |
|------------|----------|----------|----------|----------|----------|----------|----------|----------|----------|----------|----------|----------|
| <b>1</b>   | -1       | -1       | -1       | +1       | -1       | +1       | +1       | -1       | +1       | +1       | +1       | 1827693  |
| <b>2</b>   | 0        | 0        | 0        | 0        | 0        | 0        | 0        | 0        | 0        | 0        | 0        | 2002728  |
| <b>3</b>   | 0        | 0        | 0        | 0        | 0        | 0        | 0        | 0        | 0        | 0        | 0        | 2342932  |
| <b>4</b>   | 1        | -1       | 1        | 1        | 1        | -1       | -1       | -1       | 0        | -1       | +1       | 684906   |
| <b>5</b>   | -1       | -1       | +1       | -1       | +1       | +1       | -1       | +1       | +1       | +1       | -1       | 575713.4 |
| <b>6</b>   | +1       | -1       | +1       | +1       | -1       | +1       | +1       | +1       | -1       | -1       | -1       | 305544.2 |
| <b>7</b>   | -1       | +1       | +1       | -1       | +1       | +1       | +1       | -1       | -1       | -1       | +1       | 2487039  |
| <b>8</b>   | 0        | 0        | 0        | 0        | 0        | 0        | 0        | 0        | 0        | 0        | 0        | 3031723  |
| <b>9</b>   | +1       | +1       | +1       | -1       | -1       | -1       | +1       | -1       | +1       | +1       | -1       | 7105.68  |
| <b>10</b>  | +1       | +1       | -1       | -1       | -1       | +1       | -1       | +1       | +1       | -1       | +1       | 3435682  |
| <b>11</b>  | +1       | -1       | -1       | -1       | +1       | -1       | +1       | +1       | -1       | +1       | +1       | 2380498  |
| <b>12</b>  | -1       | -1       | -1       | -1       | -1       | -1       | -1       | -1       | -1       | -1       | -1       | 353246.4 |
| <b>13</b>  | -1       | +1       | +1       | +1       | -1       | -1       | -1       | +1       | -1       | +1       | +1       | 7215017  |
| <b>14</b>  | 0        | 0        | 0        | 0        | 0        | 0        | 0        | 0        | 0        | 0        | 0        | 2303496  |
| <b>15</b>  | +1       | +1       | -1       | +1       | +1       | +1       | -1       | -1       | -1       | +1       | -1       | 3853949  |
| <b>16</b>  | -1       | +1       | -1       | +1       | +1       | -1       | +1       | +1       | +1       | -1       | -1       | 3846336  |

465

466

467

468

469

470

471

472

473 **Table 2**

474

| Source                        | Sum of Squares | df | Mean Square | F-value | p-value |                 |
|-------------------------------|----------------|----|-------------|---------|---------|-----------------|
| <b>Model</b>                  | 4.905E+13      | 1  | 4.905E+12   | 35.23   | 0.0005  | significant     |
| A-D-Maltose                   | 2.648E+12      | 1  | 2.648E+12   | 19.02   | 0.0073  |                 |
| B-Yeast extract               | 1.805E+13      | 1  | 1.805E+13   | 129.65  | <0.0001 |                 |
| C-Dextrose                    | 1.630E+12      | 1  | 1.630E+12   | 11.70   | 0.0188  |                 |
| D-Calcium carbonate           | 6.013E+12      | 1  | 6.013E+12   | 43.19   | 0.0012  |                 |
| F-Sodium chloride             | 3.338E+11      | 1  | 3.338E+11   | 2.40    | 0.1822  |                 |
| G-Magnesium sulphate          | 2.309E+12      | 1  | 2.309E+12   | 16.59   | 0.0096  |                 |
| H-Ferrous sulphate            | 6.085E+12      | 1  | 6.085E+12   | 43.70   | 0.0012  |                 |
| J-Tween 80                    | 3.222E+12      | 1  | 3.222E+12   | 23.14   | 0.0048  |                 |
| K-Asparagine                  | 1.878E+12      | 1  | 1.878E+12   | 13.49   | 0.0144  |                 |
| L-Sodium dihydrogen phosphate | 6.884E+12      | 1  | 6.884E+12   | 49.45   | 0.0009  |                 |
| <b>Residual</b>               | 6.961E+11      | 5  | 1.392E+11   |         |         |                 |
| Lack of Fit                   | 1.283E+11      | 2  | 6.413E+10   | 0.3388  | 0.7368  | not significant |
| Pure Error                    | 5.678E+11      | 3  | 1.893E+11   |         |         |                 |
| <b>Cor Total</b>              | 4.975E+13      | 1  |             |         |         |                 |
|                               |                | 5  |             |         |         |                 |

**Coefficient R<sup>2</sup> 0.9860; Adjusted R<sup>2</sup> 0.9580; Predicted R<sup>2</sup> 0.8719; Adeq Precision 23.2982**  
**C.V. (Co-efficient of Variation) = 16.29%**

475

476 **Table 3**

| <b>Source</b>       | <b>Sum of Squares</b> | <b>df</b> | <b>Mean Square</b> | <b>F-value</b> | <b>p-value</b> |                 |
|---------------------|-----------------------|-----------|--------------------|----------------|----------------|-----------------|
| Block               | 1.280E+13             | 2         | 6.402E+12          |                |                |                 |
| <b>Model</b>        | 1.996E+14             | 14        | 1.426E+13          | 12.34          | < 0.0001       | significant     |
| A-D-Maltose         | 3.972E+11             | 1         | 3.972E+11          | 0.3437         | 0.5678         |                 |
| B-Yeast extract     | 1.041E+14             | 1         | 1.041E+14          | 90.09          | < 0.0001       |                 |
| C-Dextrose          | 2.479E+12             | 1         | 2.479E+12          | 2.15           | 0.1667         |                 |
| D-Calcium carbonate | 1.517E+13             | 1         | 1.517E+13          | 13.12          | 0.0031         |                 |
| AB                  | 6.942E+11             | 1         | 6.942E+11          | 0.6007         | 0.4522         |                 |
| AC                  | 3.155E+13             | 1         | 3.155E+13          | 27.30          | 0.0002         |                 |
| AD                  | 2.107E+11             | 1         | 2.107E+11          | 0.1823         | 0.6764         |                 |
| BC                  | 1.092E+12             | 1         | 1.092E+12          | 0.9446         | 0.3488         |                 |
| BD                  | 8.367E+12             | 1         | 8.367E+12          | 7.24           | 0.0185         |                 |
| CD                  | 6.559E+10             | 1         | 6.559E+10          | 0.0568         | 0.8154         |                 |
| A <sup>2</sup>      | 1.417E+13             | 1         | 1.417E+13          | 12.26          | 0.0039         |                 |
| B <sup>2</sup>      | 1.298E+13             | 1         | 1.298E+13          | 11.23          | 0.0052         |                 |
| C <sup>2</sup>      | 2.886E+12             | 1         | 2.886E+12          | 2.50           | 0.1381         |                 |
| D <sup>2</sup>      | 5.112E+11             | 1         | 5.112E+11          | 0.4423         | 0.5176         |                 |
| <b>Residual</b>     | 1.502E+13             | 13        | 1.156E+12          |                |                |                 |
| Lack of Fit         | 6.779E+12             | 10        | 6.779E+11          | 0.2467         | 0.9600         | not significant |
| Pure Error          | 8.244E+12             | 3         | 2.748E+12          |                |                |                 |
| <b>Cor Total</b>    | 2.274E+14             | 29        |                    |                |                |                 |

**Coefficient R<sup>2</sup> 0.9300; Adjusted R<sup>2</sup> 0.8546; Predicted R<sup>2</sup> 0.7269; Adeq Precision 12.7578; C.V. (Co-efficient of Variation) = 25.47**

477

478

**A**

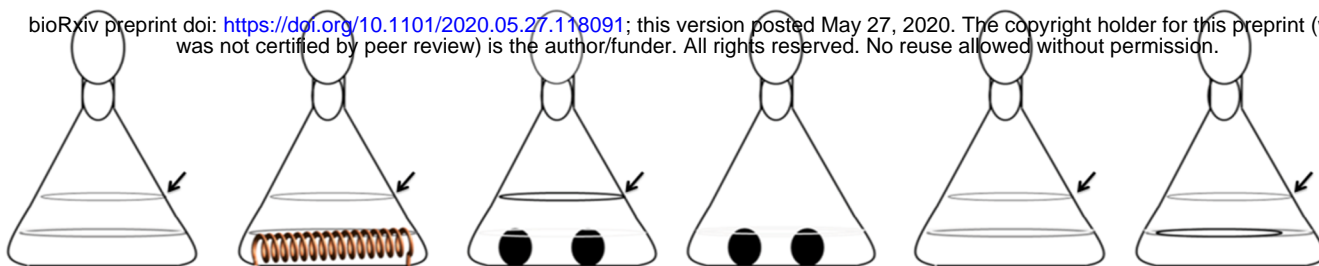

**B**

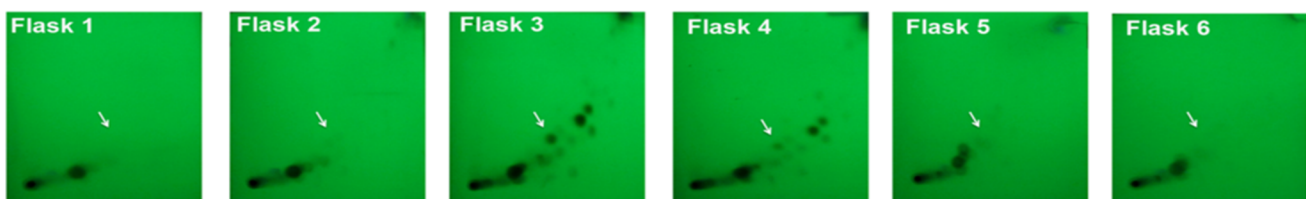

**C**

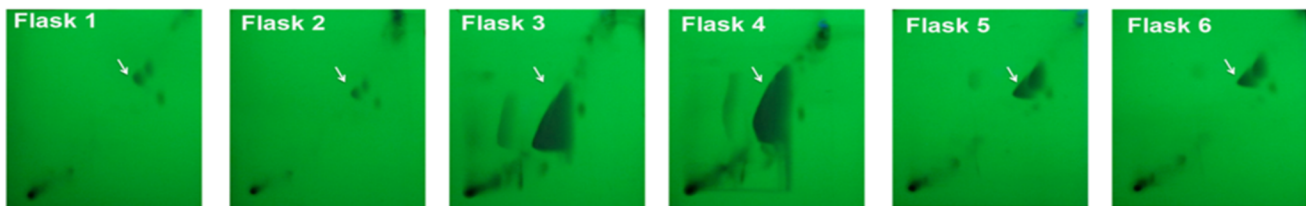

**D** Production of Urdamycins

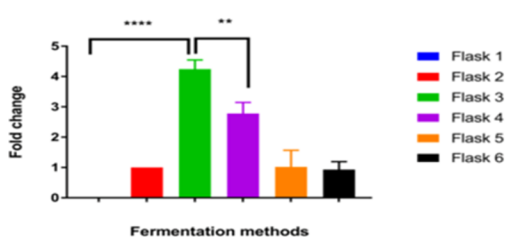

\* denotes significant difference between the data ( $p < 0.05$ ) and the number of stars indicates the degree of significance

**E**

Production of Chrysomycins

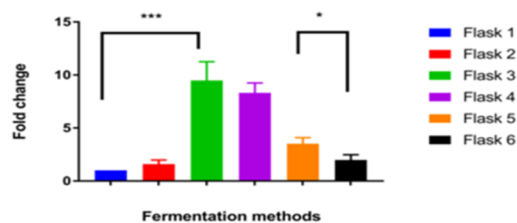

\* denotes significant difference between the data ( $p < 0.05$ ) and the number of stars indicates the degree of significance

**F**

Growth curve analysis

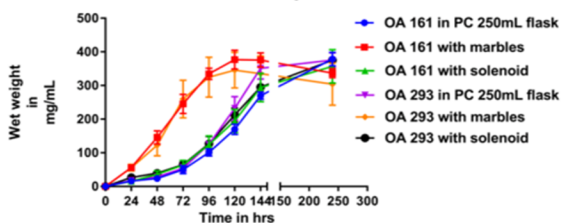

**G**

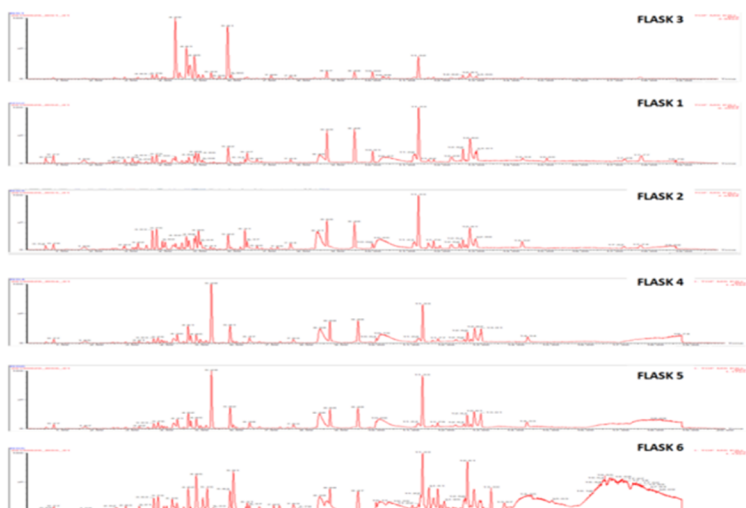

**H**

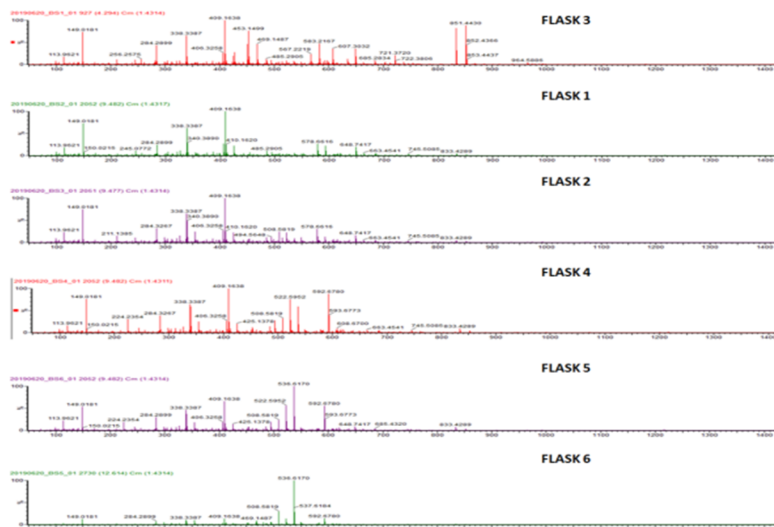

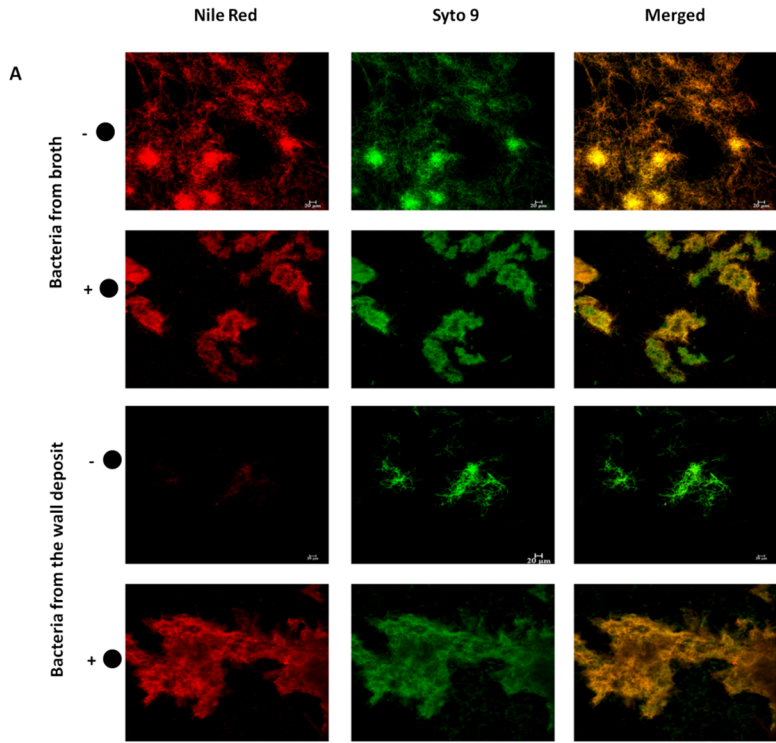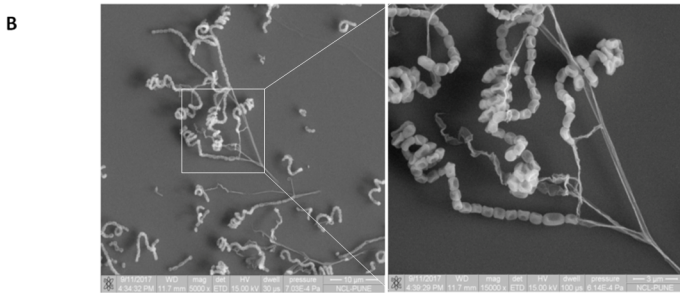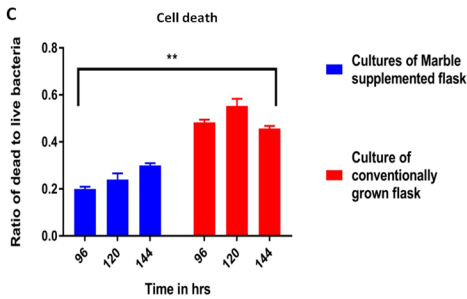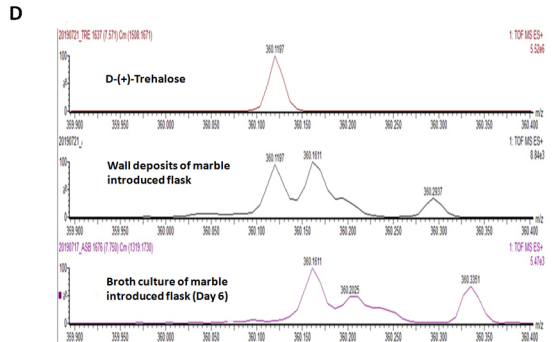

\*\* denotes that the results are significantly different with a 'p' value < 0.05



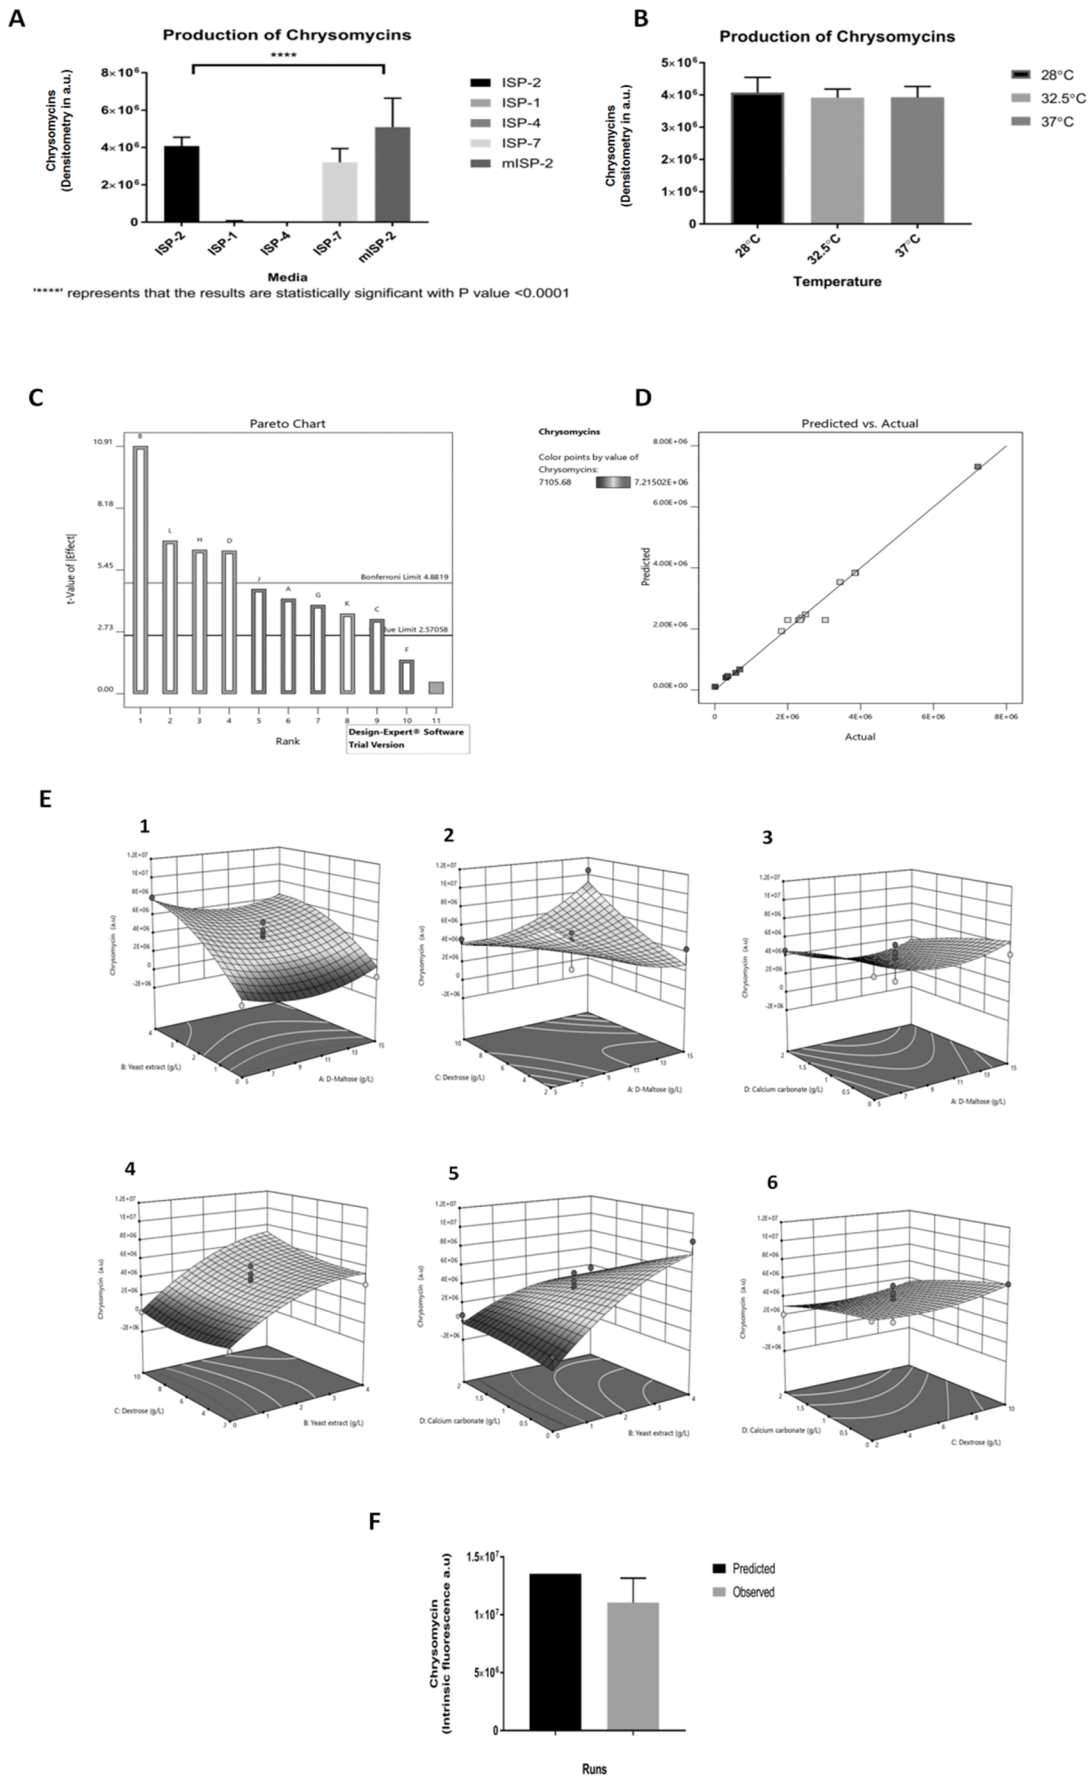

1

## Supplementary data

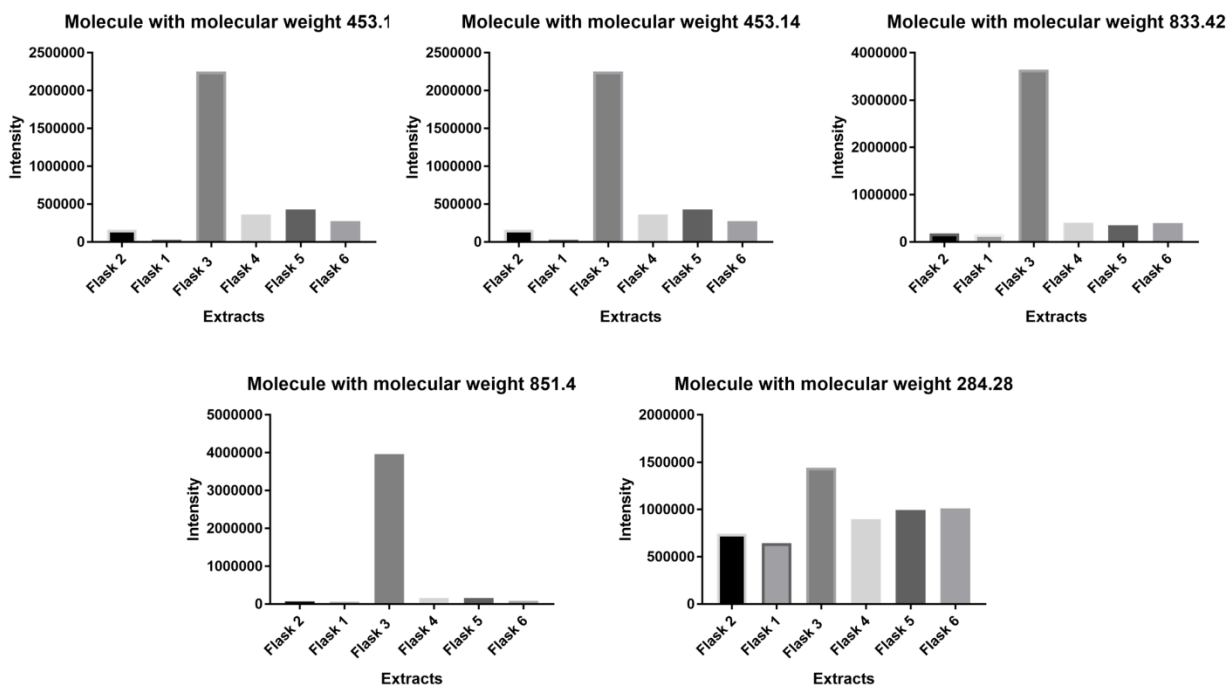

2

3 Supplementary Figure 1: Representative images showing amount of random molecules present in  
4 extracts from different flasks. Molecule with molecular weight 284.28 had insignificant  
5 variations in amount while others follow similar pattern found in case of chrysomycins and  
6 urdamycins.

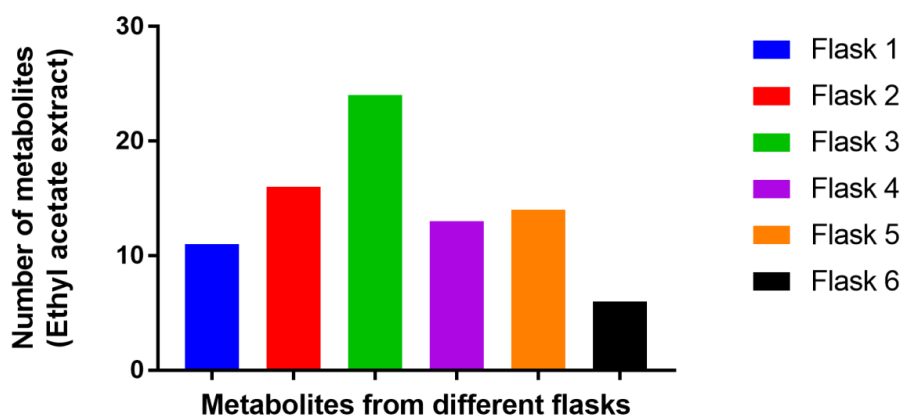

7

8 Supplementary figure 2: Difference in qualitative production of secondary metabolites of Ethyl  
9 acetate extracts of *Streptomyces* sp., OA161 culture filtrate.

1

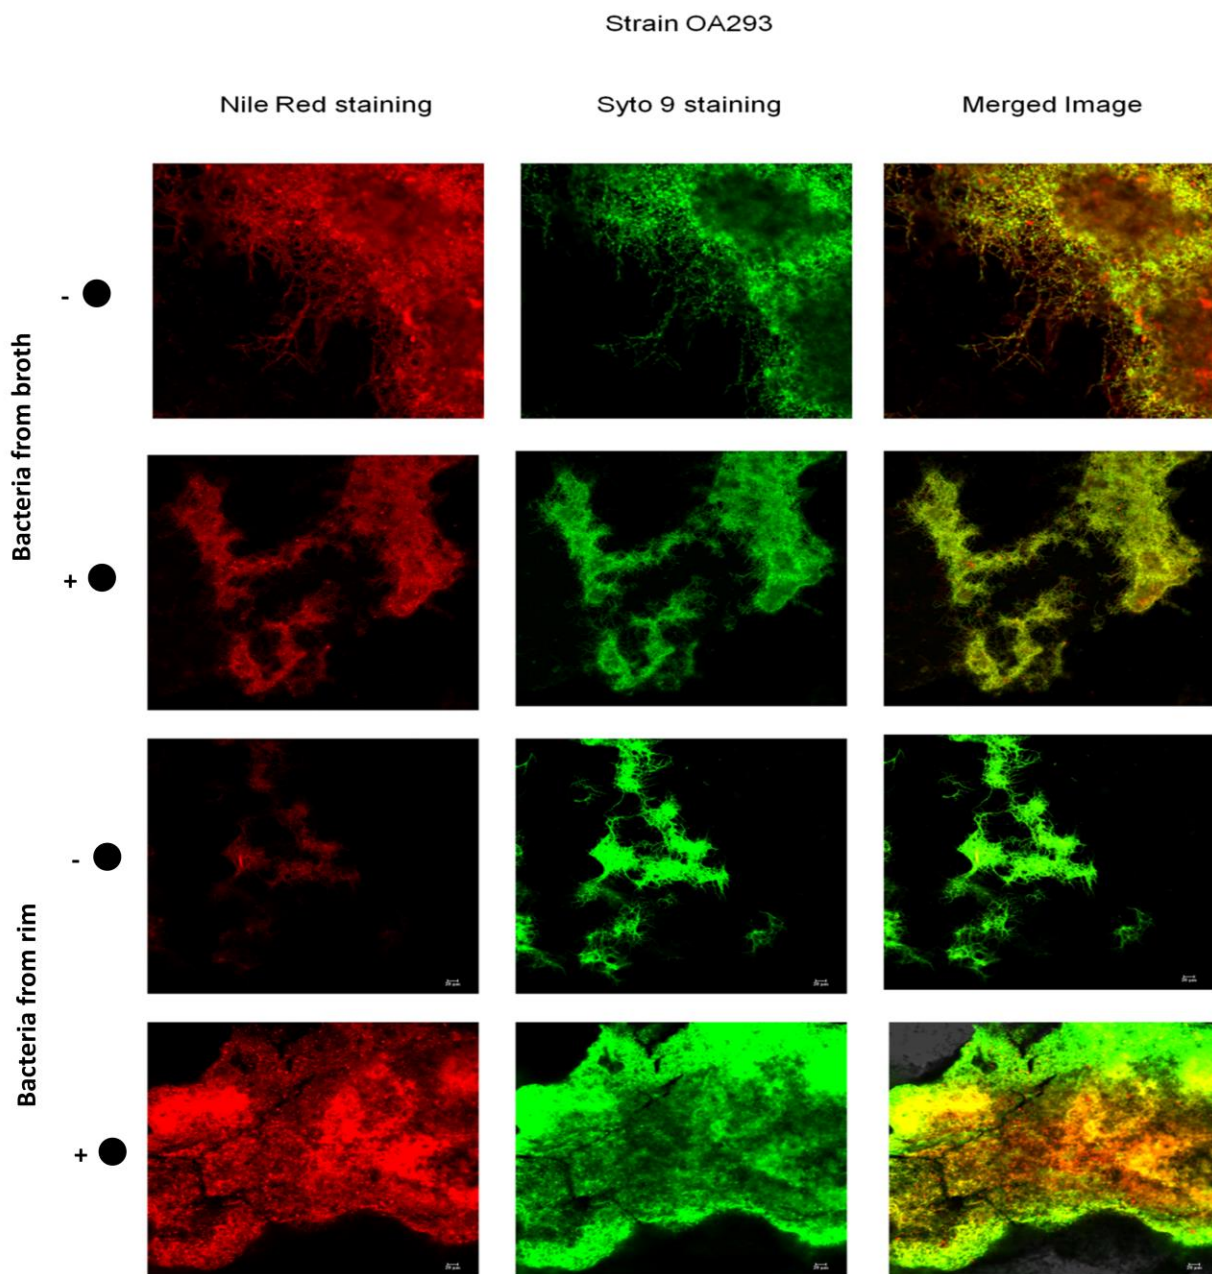

10

11 Supplementary Figure 3: Confocal microscopy images show bacteria from broth and wall  
12 deposits. '+●' and '-●' represent bacteria from flasks with and without marbles, respectively.

13 The differentiated aerial mycelium appears red and all live bacteria are shown green.

14

15

16

17 A

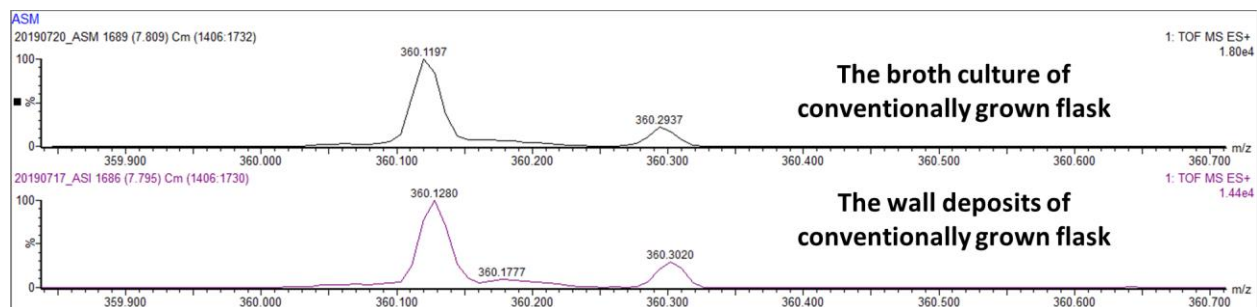

18

19 B

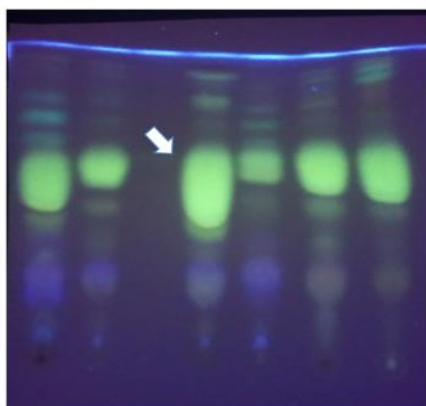

20

C

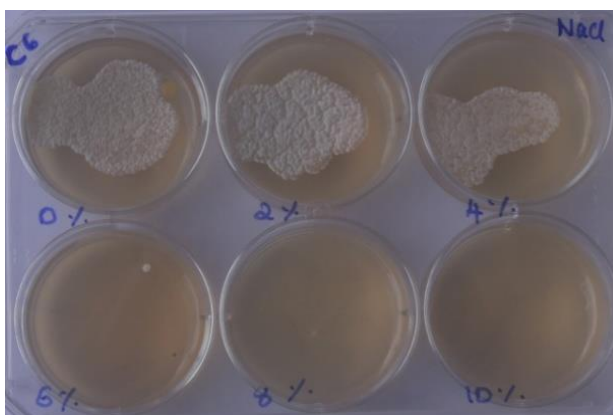

21 D

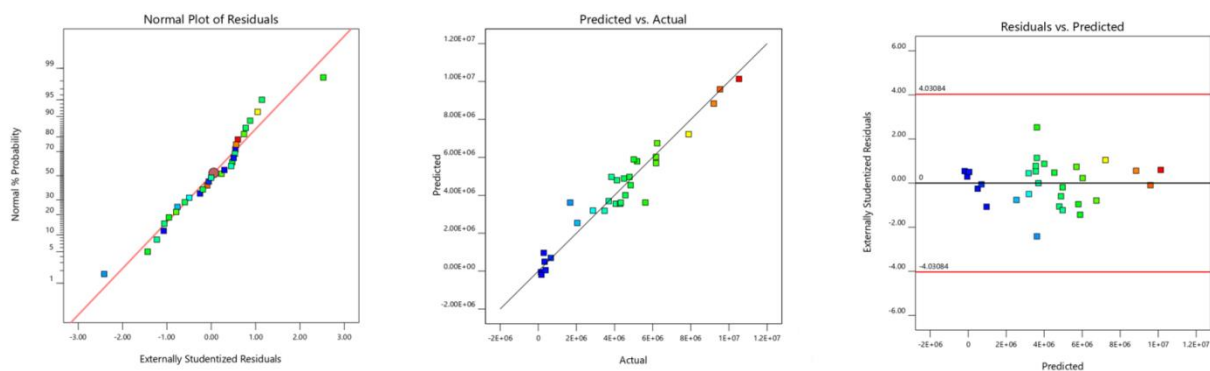

22

23 Supplementary Figure 4: A. Measurement of trehalose in a culture without mechanical disruptors

24 Trehalose was present in both wall deposits and the broth culture. B: Representative Thin layer

25 chromatography plate from which chrysomycin was estimated. Arrow points at chrysomycins

26 which are green fluorescent. C. Salt (NaCl) tolerance of *Streptomyces sp.*, OA161. It can tolerate

27 upto 4 percent and thus a mild halophile. D. Diagnostic plots for Box-Behnken design

28

29

|     | Factor 1 | Factor 2 | Factor 3 | Factor 4 | Factor 5 | Factor 6 | Factor 7 | Factor 8 | Factor 9 | Factor 10 | Factor 11 | Response |
|-----|----------|----------|----------|----------|----------|----------|----------|----------|----------|-----------|-----------|----------|
|     | A        | B        | C        | D        | E        | F        | G        | H        | J        | K         | L         | Y        |
| Run | g/L      | g/L      | g/L      | g/L      | C        | %        | g/L      | mg/L     | %        | g/L       | g/L       | a.u      |
| 1   | 5        | 0        | 2        | 2        | 28       | 2        | 2        | 0        | 0.1      | 5         | 2         | 1827693  |
| 2   | 10       | 2        | 6        | 1        | 32.5     | 1        | 1        | 5        | 0.05     | 2.5       | 1         | 2002728  |
| 3   | 10       | 2        | 6        | 1        | 32.5     | 1        | 1        | 5        | 0.05     | 2.5       | 1         | 2342932  |
| 5   | 5        | 0        | 10       | 0        | 37       | 2        | 0        | 10       | 0.1      | 5         | 0         | 575713.4 |
| 6   | 15       | 0        | 10       | 2        | 28       | 2        | 2        | 10       | 0        | 0         | 0         | 305544.2 |
| 7   | 5        | 4        | 10       | 0        | 37       | 2        | 2        | 0        | 0        | 0         | 2         | 2487039  |
| 8   | 10       | 2        | 6        | 1        | 32.5     | 1        | 1        | 5        | 0.05     | 2.5       | 1         | 3031723  |
| 9   | 15       | 4        | 10       | 0        | 28       | 0        | 2        | 0        | 0.1      | 5         | 0         | 7105.68  |
| 10  | 15       | 4        | 2        | 0        | 28       | 2        | 0        | 10       | 0.1      | 0         | 2         | 3435682  |
| 11  | 15       | 0        | 2        | 0        | 37       | 0        | 2        | 10       | 0        | 5         | 2         | 2380498  |
| 12  | 5        | 0        | 2        | 0        | 28       | 0        | 0        | 0        | 0        | 0         | 0         | 353246.4 |
| 13  | 5        | 4        | 10       | 2        | 28       | 0        | 0        | 10       | 0        | 5         | 2         | 7215017  |
| 14  | 10       | 2        | 6        | 1        | 32.5     | 1        | 1        | 5        | 0.05     | 2.5       | 1         | 2303496  |
| 15  | 15       | 4        | 2        | 2        | 37       | 2        | 0        | 0        | 0        | 5         | 0         | 3853949  |
| 16  | 5        | 4        | 2        | 2        | 37       | 0        | 2        | 10       | 0.1      | 0         | 0         | 3846336  |

30

31 Supplementary Table 1, shows the medium components and their respective concentrations used  
 32 in the PBD design. A:D-Maltose; B:Yeast extract; C: Dextrose; D: Calcium carbonate;  
 33 E:Temperature; F: Sodium chloride; G: Magnesium sulphate; H: Ferrous sulphate; J: Tween 80;  
 34 K: Asparagine; L:Sodium dihydrogen phosphate; Y: Chrysomycins production.

| Block   | Run | Factor 1<br>A:<br>D-Maltose<br>g/L | Factor 2<br>B:<br>Yeast extract<br>g/L | Factor 3<br>C:<br>Dextrose<br>g/L | Factor 4<br>D:<br>Calcium carbonate<br>g/L | Response<br>Chrysomycins<br>a.u |
|---------|-----|------------------------------------|----------------------------------------|-----------------------------------|--------------------------------------------|---------------------------------|
| Block 1 | 1   | 10                                 | 2                                      | 10                                | 0                                          | 6.17649E+06                     |
| Block 1 | 2   | 10                                 | 2                                      | 6                                 | 1                                          | 5.61584E+06                     |
| Block 1 | 3   | 5                                  | 4                                      | 6                                 | 1                                          | 7.88417E+06                     |
| Block 1 | 4   | 10                                 | 2                                      | 10                                | 2                                          | 2.86747E+06                     |

4

|         |    |    |   |    |   |             |
|---------|----|----|---|----|---|-------------|
| Block 1 | 5  | 15 | 0 | 6  | 1 | 288238      |
| Block 1 | 6  | 10 | 2 | 6  | 1 | 1.67411E+06 |
| Block 1 | 7  | 5  | 0 | 6  | 1 | 330486      |
| Block 1 | 8  | 15 | 4 | 6  | 1 | 6.17558E+06 |
| Block 1 | 9  | 10 | 2 | 2  | 2 | 2.04669E+06 |
| Block 1 | 10 | 10 | 2 | 2  | 0 | 4.84351E+06 |
| Block 2 | 11 | 10 | 2 | 6  | 1 | 4.06793E+06 |
| Block 2 | 12 | 15 | 2 | 6  | 2 | 3.47532E+06 |
| Block 2 | 13 | 10 | 0 | 2  | 1 | 142894      |
| Block 2 | 14 | 10 | 4 | 2  | 1 | 4.12303E+06 |
| Block 2 | 15 | 10 | 2 | 6  | 1 | 4.29516E+06 |
| Block 2 | 16 | 10 | 0 | 10 | 1 | 167212      |
| Block 2 | 17 | 5  | 2 | 6  | 2 | 4.56646E+06 |
| Block 2 | 18 | 15 | 2 | 6  | 0 | 5.01052E+06 |
| Block 2 | 19 | 10 | 4 | 10 | 1 | 6.23688E+06 |
| Block 2 | 20 | 5  | 2 | 6  | 0 | 5.18363E+06 |
| Block 3 | 21 | 15 | 2 | 2  | 1 | 4.32849E+06 |
| Block 3 | 22 | 5  | 2 | 10 | 1 | 4.49389E+06 |
| Block 3 | 23 | 10 | 2 | 6  | 1 | 3.83515E+06 |
| Block 3 | 24 | 10 | 4 | 6  | 2 | 3.69376E+06 |
| Block 3 | 25 | 10 | 4 | 6  | 0 | 9.20238E+06 |
| Block 3 | 26 | 10 | 0 | 6  | 2 | 659148      |
| Block 3 | 27 | 15 | 2 | 10 | 1 | 1.05265E+07 |
| Block 3 | 28 | 10 | 0 | 6  | 0 | 382622      |
| Block 3 | 29 | 5  | 2 | 2  | 1 | 9.5291E+06  |
| Block 3 | 30 | 10 | 2 | 6  | 1 | 4.78289E+06 |

35

36 Supplementary Table 2 shows Box-Behnken matrix of the experimental design along with the  
37 medium components with their concentrations.

38
